# Supplementary material for: Cloning of the Human MORG1 Promoter: Differential Regulation by Hypoxia and Prolyl-Hydroxylase Inhibitors
Source: MDPI journal article supplement (doi:10.3390/genes13030427), 2022-02-25
Supplement: s1 [file s1]

**Table S1.** Primers' sequences for Electrophoretic mobility shift analyses of the human *MORG1* promoter putative HIF binding sites.

| Name                                    | Forward 5'- 3'                          | Reverse 5'- 3'                  |
|-----------------------------------------|-----------------------------------------|---------------------------------|
| <i>HIF A</i>                            | TACACCCAAG <u>CGT</u> GGGTTTCTAAGGCGCG  | CGCGCCTTAGAAACCCACGCTTGGGTGTA   |
| <i>HIF A mut</i>                        | TACACCCAAGAAAGGGTTTCTAAGGCGCGGA         | TCCGCGCCTTAGAAACCCTTTCTTGGGTGTA |
| <i>HIF B</i>                            | CAGCTTCCGG <u>CGT</u> GCAAGCTGAGGGCGGAT | ATCCGCCCTCAGCTTGCACGCCGGAAGCTG  |
| <i>HIF B mut</i>                        | CAGCTTCCGGAAGCAAGCTGAGGGCGGAT           | ATCCGCCCTCAGCTTGCTTTCCGGAAGCTG  |
| <i>HIF C</i>                            | GCCAGATCAGCCTCTTCCGCTGC                 | GCAGCGGAAGAGGCGTGATCTGGC        |
| <i>HIF C mut</i>                        | GCCAGATCCTTCTTCCGCTGC                   | GCAGCGGAAGAGGAAGATCTGGC         |
| <i>HIF D</i>                            | TACTCTAGATACGTGGTTTCTAGTCCTACT          | AGTAGGACTAGAAACCACGTATCTAGAGTA  |
| <i>HIF D mut</i>                        | TACTCTAGATAAAGGTTTCTAGTCCTACT           | AGTAGGACTAGAAACCTTTTATCTAGAGTA  |
| <i>HIF-1<math>\alpha</math> IL8</i>     | TCTGTACGTGACCACACTCACCTC                | GAGGTGAGTGGTCACGTACAGA          |
| <i>HIF-1<math>\alpha</math> IL8 mut</i> | TCTGTAAAAGACCACACTCACCTC                | GAGGTGAGTGGTCTTTTACAGA          |

\* The mutated primer sequences were used as well for generation of the corresponding mutations on the wild type *MORG1* promoter reporter constructs. The HIF binding sites and the mutated HRE binding sites on the sequences are underlined. The HIF-1 $\alpha$  consensus binding sequence is based on the IL-8 promoter.
